# Supplementary material
Source: PubMed Central journal article supplement (PMC4114032)
Supplement: NIHMS601667-supplement-Supplementary_Note.pdf [file NIHMS601667-supplement-Supplementary_Note.pdf]

**Supplementary Note 1.** Precise definition of the term proteoform.

**pro·te·o·form**  [proh-tee-o-form]

*noun*

1. A specific molecular form of a protein product arising from a specific gene: *to measure a specific proteoform from a cell.*
2. **Pl.** Highly related protein molecules arising from all combinatorial sources of variation giving rise to products arising from a single gene. These include products differing due to genetic variations, alternatively spliced RNA transcripts, and post-translational modifications.
3. The term includes all PTMs classified by the PSI-MOD ontology (which uses PSI-MS standardized names for protein modifications), except those classified as children of reagent derivatized residues (MOD:00848) or isotope labeled residues (MOD:00702). (<http://www.unimod.org/names.html>).
